# Supplementary material
Source: publisher figshare collection journal article supplement (https://geolsoc.figshare.com/ndownloader/files/31316030)
Supplement: Supplementary file 1 [file 31316030]

## Sheet: Sheet1 (2)
Commodity	Smelter name	Region	Smelter location	Sources of contamination	Elements in smelter emissions	Years in operation	Volume of material	Distance smelter metals are detected in humus	Depth of soil horizon, smelter elements are detected	References
Ni-Cu-PGE	Copper Cliff, Coniston and Falconbridge	Sudbury Igneous Complex, Sudbury, Ontario	Copper Cliff smelter (5 km southwest of Sudbury); Coniston Smelter (15 km east of Sudbury); (Falconbridge smelter approximately 20 km northeast of Sudbury)	Particulates < 7 µm (FeO, Ni, Cu; Cu- and Ni-bearing spinel, silicate, and sulfide mineral inclusions). Angular sulfide minerals and NiO particulates is often coated with Fe-Al-hydroxide and aluminosilicate minerals.	Fe, Cu, Ni, Zn, Se, As, Pb and S	Open pit roasting (1885-1928), Coniston (1913-1972), Falconbridge (1930-1970s) and Copper Cliff Super stack (1972-2020)	Over 10,000 tonne of particulate matter over the last 100 years; Sulfur dioxide emissions (2.7 million tonnes in 1970)	42 % emitted Ni, 40 % emitted Cu and 52 % emitted Fe are deposited within a 60 km radius; up to 60 % of particulates are carried beyond 60 km	Highest metal and metalloid (such as Ni, Cu, Zn, Co, As, Pb, and Se) concentrations in the top 5-10 cm; contamination restricted to the top 20 cm.	Adamo et al., 1996; Dudka and Adriano, 1997; Dudka et al., 1995, 1996; Freedman and Hutchinson, 1980; Hutchinson and Gunderman, 1998; Hutchinson and Whitby, 1974; Hutchinson and Whitby, 1977; Johnson and Hale, 2008; Schindler, 2014; Wren et al., 2012
Base metals	Horne	Abitibi-Témiscamingue region, northwestern Québec	Rouyn Noranda	Mining operations emit contaminants concentrated in coarse particulates (> 3 μm) mainly as windblown dust, while smelters discharge contaminants through fine particles (< 1 μm); slag.	Cu, Pb, Zn, As, Cd, Hg, Fe, Sn	Horne smelter (1927-1990)	1.5 million metric tonnes of emissions in 1965	Trace metals released from dust within a 100 km	Contamination restricted to organic rich and upper B-horizons	Caplette et al., 2015; Daggupaty et al., 2006; Dinis et al., 2021; Dixit et al., 2006 ;Johnson and Hale, 2008; Leverington and Schindler, 2018; Zdanowicz et al., 2006
Base metals	Flin Flon	Flin Flon-Snow Lake region (Manitoba and saskatchewan)	Flin Flon	Atmospheric fallout of smelter-derived gases and particulate emissions; Cu, Zn, Fe sulfates; oxides and sulfides commonly containing traces of Pb, As, and Cd. Metal particulates (oxides and sulfates) deposited as dustfall and rainfall. Mercury deposited as very fine oxide particles; Wind-blown dust from dried tailings, exposed ore residue in dumps and ore carriers.	Iron, Pb and Zn, with lesser quantities of As, Cu, Cd, and Hg, and trace amounts of Ag, Al, Mg, Mn, Se, Sb, Ni, Cr, and Co. Approx. 1.5 million tons of SO2, 200 tonnes of Pb, 120 tonnes of As, 50 tonnes of Se, and over 1000 tonnes of Cu and Ni annually during peak years of emission.	1930-2010	1930-1974: 7150 t/year; 1974-1995: 6834 t/year; 1995-1999: 632 t/year	Radial contamination detected in forest litter 70 km for Cd, 76 km for Pb, 84 km for Zn, 85 km for Hg, 90 km for Cu and 104 km for As.	Contamination mainly in organic-rich horizon but at highly contaminated sites, smelter metals can migrate down to B-horizon (especially Zn) and at least to 45 cm depth; absence of contamination at depth in upper C-horizon ; Up to 400 ppb (250 times the regional background) Hg in humus in the immediate vicinity of smelter	Henderson and McMartin, 1995, Henderson et al., 1998; Knight and Henderson, 2006; Lanteigne et al., 2014; McMartin et al., 1999
